# Supplementary material for: A ternary oxygen-vacancy abundant ZnMn2O4/MnCO3/nitrogen-doped reduced graphene oxide hybrid towards superior-performance lithium storage
Source: Royal Society of Chemistry journal article supplement (doi:10.1039/d3dt02335d), 2023-01-01
Supplement: d3dt02335d1.pdf [file d3dt02335d1.pdf]

## Supporting Information

**A ternary oxygen-vacancy abundant ZnMn<sub>2</sub>O<sub>4</sub>/MnCO<sub>3</sub>/nitrogen-doped  
reduced graphene oxide hybrid towards superior-performance lithium  
storage**

Shuo Wang, Yuzhen Kuang, Hanlu Wang, Xi Guo, Bingqiang Cao, Li Li\*

School of Materials Science and Engineering, University of Jinan, Jinan 250022,  
Shandong, China

\*Corresponding authors at: School of Materials Science and Engineering, University of

Jinan, Jinan 250022, PR China.

E-mail addresses: mse\_lil@ujn.edu.cn (L. Li)

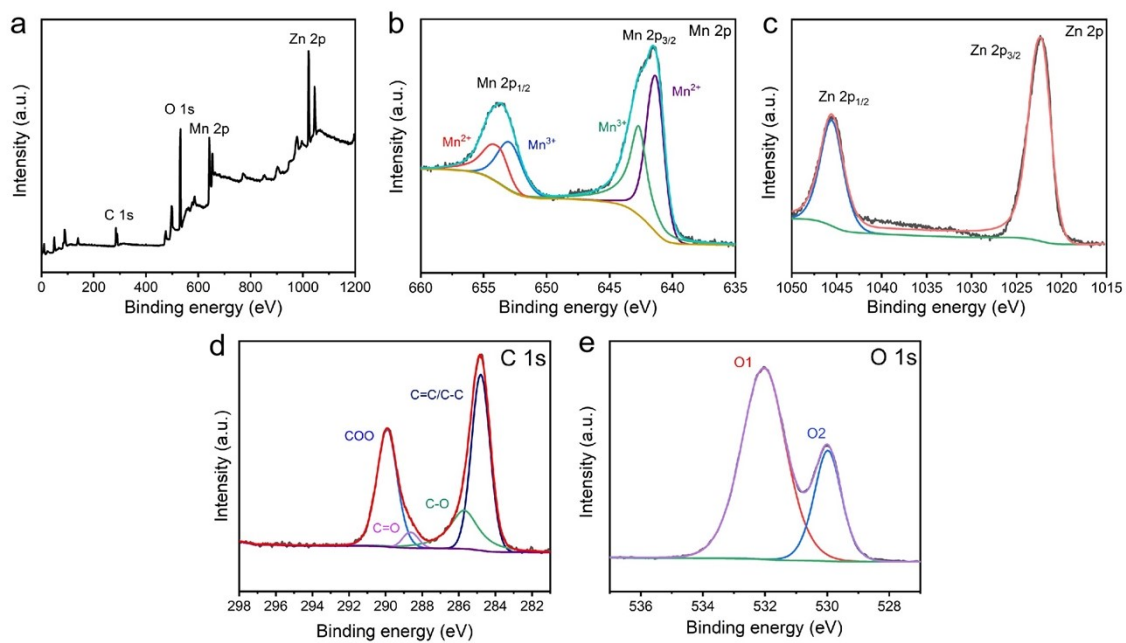

**Figure S1.** (a) Survey XPS spectra and high-resolution elemental (b) Mn 2p, (c) Zn 2p, (d) C 1s, and (e) O 1s spectra

of

the

ZnMn<sub>2</sub>O<sub>4</sub>/MnCO<sub>3</sub>.

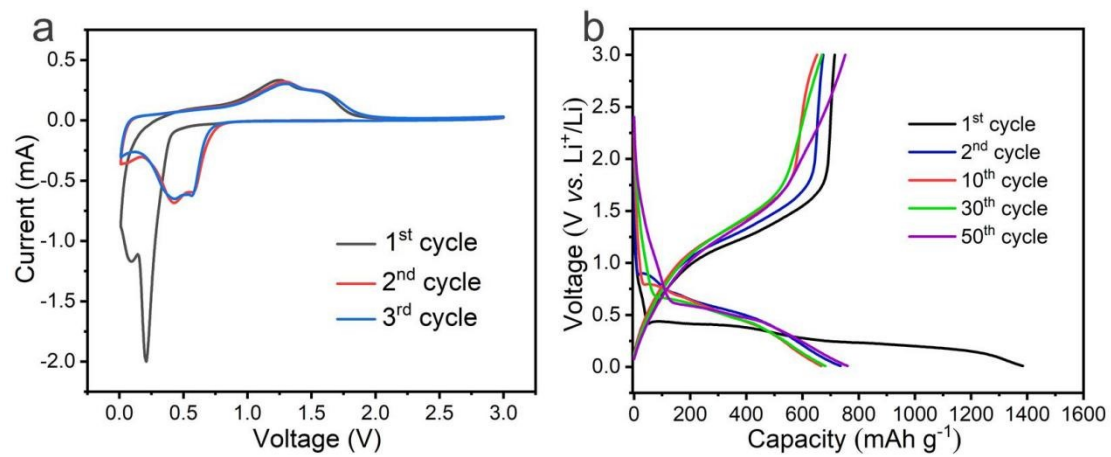

**Figure S2.** (a) CV cycling curves in the initial 3 cycles at  $0.2\text{mV s}^{-1}$  and (b) charge/discharge curves of ZnMn<sub>2</sub>O<sub>4</sub>/MnCO<sub>3</sub>.

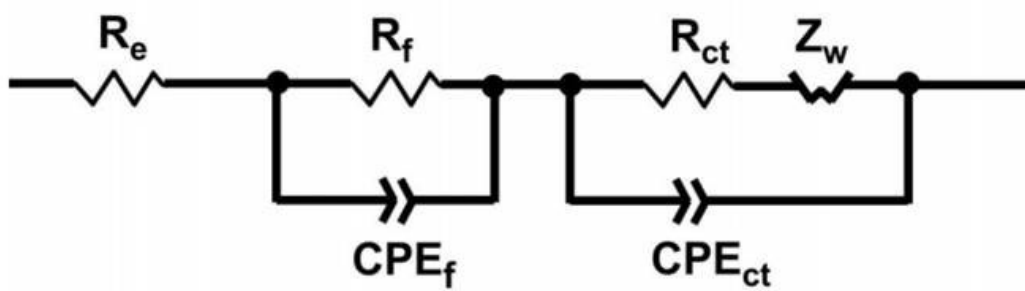

**Figure S3.** Equivalent circuit model for Nyquist plots in Figure 4d.

The equivalent circuit model (FigureS2 includes ohmic resistance of the electrolyte and cell components ( $R_e$ ), SEI layer resistance ( $R_f$ ), charge-transfer resistance ( $R_{ct}$ ), Warburg diffusion impedance ( $Z_w$ ), dielectric relaxation capacitance ( $CPE_f$ ) and double layer capacitance ( $CPE_{ct}$ ).

**Table S1.** Discharge specific capacity of this work as well as other ZnMn<sub>2</sub>O<sub>4</sub>-based, MnCO<sub>3</sub>-based and some transition metal oxide materials as LIBs anodes under different current density.

| Materials                                               | Current density (mA g <sup>-1</sup> ) | Capacity (mAh g <sup>-1</sup> ) | Reference |
|---------------------------------------------------------|---------------------------------------|---------------------------------|-----------|
| ZnMn <sub>2</sub> O <sub>4</sub> /MnCO <sub>3</sub> /NG | 100                                   | 853                             | This work |
|                                                         | 200                                   | 784                             |           |
|                                                         | 500                                   | 665                             |           |
|                                                         | 1000                                  | 569                             |           |
|                                                         | 2000                                  | 459                             |           |
|                                                         | 4000                                  | 331                             |           |
|                                                         | 8000                                  | 194                             |           |
| MnCO <sub>3</sub> -RGO                                  | 200                                   | 687.4                           | 35        |
|                                                         | 400                                   | 611.7                           |           |
|                                                         | 800                                   | 531.4                           |           |
|                                                         | 1200                                  | 422.8                           |           |
|                                                         | 1600                                  | 338.7                           |           |
| ZnMn <sub>2</sub> O <sub>4</sub> (ZMO <sub>4</sub> )    | 100                                   | 376.7                           | 46        |
|                                                         | 200                                   | 222.6                           |           |
|                                                         | 500                                   | 156.7                           |           |
|                                                         | 1000                                  | 110                             |           |
| ZnO/rGO-0.3                                             | 100                                   | 519                             | 47        |
|                                                         | 200                                   | 399                             |           |
|                                                         | 500                                   | 318                             |           |
|                                                         | 1000                                  | 272                             |           |
|                                                         | 2000                                  | 247                             |           |
| MnO@ZnMn <sub>2</sub> O <sub>4</sub> /N-C               | 50                                    | 635                             | 48        |
|                                                         | 100                                   | 655                             |           |
|                                                         | 200                                   | 654                             |           |
|                                                         | 500                                   | 602                             |           |
|                                                         | 1000                                  | 547                             |           |
|                                                         | 2000                                  | 464                             |           |
|                                                         | 5000                                  | 287                             |           |
| ZnMn <sub>2</sub> O <sub>4</sub> (S8)                   | 100                                   | 439.1                           | 49        |
|                                                         | 200                                   | 301.4                           |           |
|                                                         | 500                                   | 201.3                           |           |
|                                                         | 1000                                  | 107.7                           |           |
| PF-ZMO                                                  | 100                                   | 922                             | 50        |
|                                                         | 200                                   | 655.8                           |           |
|                                                         | 300                                   | 591.1                           |           |
|                                                         | 500                                   | 533.9                           |           |
|                                                         | 1000                                  | 458.7                           |           |
|                                                         | 2000                                  | 373.1                           |           |

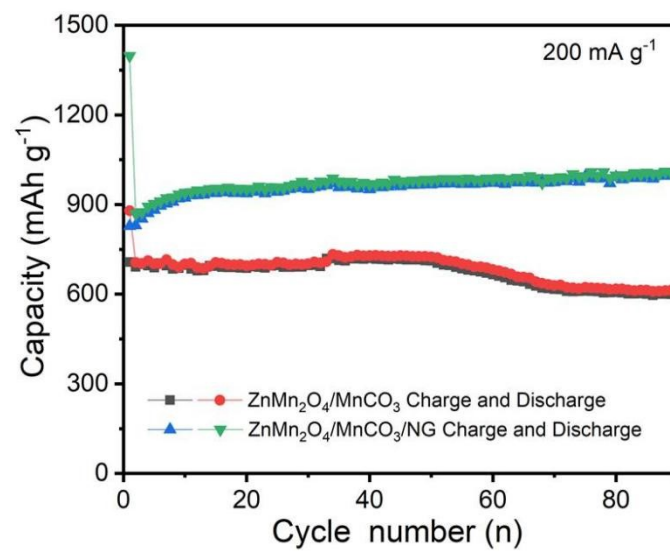

**Figure S4.** Cycling performances of ZnMn<sub>2</sub>O<sub>4</sub>/MnCO<sub>3</sub> and ZnMn<sub>2</sub>O<sub>4</sub>/MnCO<sub>3</sub>/NG electrodes at 200 mA g<sup>-1</sup>.
